# Supplementary material for: A very small amount (0.1 wt%) of Co(OH)2 nanoplates enhances triboelectric performance of polymers
Source: Royal Society of Chemistry journal article supplement (doi:10.1039/d4ta01937g), 2024-01-01
Supplement: d4ta01937g3.pdf [file d4ta01937g3.pdf]

*Electronic Supplementary Information for*  
**A very small amount (0.1 wt%) of Co(OH)<sub>2</sub> nanoplates enhances  
triboelectric performance of polymers**

Jina Park,<sup>a,†</sup> Inah Hyun,<sup>b,c,‡</sup> Yoon Kee Kim,<sup>a</sup> Hanbyeol Jung,<sup>a</sup> Dong-Min Lee,<sup>b,c</sup> Sang-Woo Kim,<sup>b,c\*</sup>  
and Seung Uk Son<sup>a\*</sup>

<sup>a</sup>*Department of Chemistry, Sungkyunkwan University, Suwon 16419, Korea*  
*E-mail: sson@skku.edu*

<sup>b</sup>*Department of Materials Science and Engineering, Yonsei University, Seoul 03722, Korea*

<sup>c</sup>*Center for Human-oriented Triboelectric Energy Harvesting, Yonsei University, Seoul 03722, Korea*  
*E-mail: kimsw1@yonsei.ac.kr*

## **Experimental Section**

**General:** SEM images of materials were obtained using JSM-7100F and JSM-7800F instruments at the Chiral Material Core Facility Center of Sungkyunkwan University. TEM images were obtained using a JSM2100F equipment. IR absorption spectra were obtained using a Bruker VERTEX70 spectrometer. PXRD patterns were obtained using a Rigaku MAX-2200 equipment. KPFM images with an area of 5 μm × 5 μm were obtained through atomic force microscopy (AFM) with a scanning speed of 0.3 Hz and set point of 13 nm using a XE-100 Park Systems. The sampling for AFM studies was conducted under air at room temperature. AC voltage of 2 V with a frequency of 17 kHz was applied at the AFM tip (NSC36, Cr/Au-coated silicon tips, tip radius < 35 nm, force constant 1 N m<sup>-1</sup>, and resonance frequency of 90 kHz).

### ***Synthetic procedures of Co(OH)<sub>2</sub> nanoplates***

For the preparation of Co(OH)<sub>2</sub> nanoplates, tetramethylammonium bromide (0.52 g, 3.4 mmol) and degassed water (200 mL) were added to a 250 mL Schlenk flask under argon. The solution was bubbled with argon gas for 5 min through a needle connected to an argon gas container. After 2 M NaOH solution (1.6 mL, 3.2 mmol) was added to the solution, CoCl<sub>2</sub> hexahydrate (0.95 g, 4.0 mmol) in degassed and distilled water (1.5 mL) was added. The reaction mixture was stirred at 60 °C for 1 h. After cooling with an ice bath, the solids (Co(OH)<sub>2</sub> nanoplates) were separated by centrifugation, washed with a mixture of ethanol (40 mL) and water (10 mL) two times and ethanol (50 mL) once, and dried under vacuum.

### ***Fabrication of PVP, PVP-Co, PU, and PU-Co films***

For the preparation of PVP and PVP-Co films, PVP mother solution was prepared as follows. PVP (10 g, Mw: 1,300,000 Aldrich Co., Cat# 437190) was dissolved in ethanol (40 g) through stirring for 4 h at 50 °C in a 70 mL vial. To check the weight of PVP per volume in PVP solution in an empirical way, four sets of the PVP solutions (4 mL) were taken and transferred to 20 mL vials and the ethanol was completely evaporated at 80 °C under vacuum. The average weight of the remained PVP in four vials was analyzed to be 0.748 g. For the preparation of a PVP film, PVP solution (4 mL) described above was loaded onto a doctor blade (Kipae E&T Co., KP-3000 V). The target coating thickness of materials was set to 30 μm. Using a doctor blade, the PVP solution was loaded on the PVC mat (Hyundai Co., 20 cm × 20 cm). After drying the PVP solution on the PVC mat for several days under air, the PVP film with a thickness of 21 μm was detached

from the PVC mat and cut to pieces with specific areas. For the preparation of PVP-Co films, Co(OH)<sub>2</sub> nanoplates (0.19, 0.37, 0.75, 1.87, 3.76, 7.56, 23.1, 39.4, 56.3, and 83.1 mg for 0.025, 0.05, 0.1, 0.25, 0.5, 1, 3, 5, 7, and 10 wt% Co(OH)<sub>2</sub> in PVP-Co films) were well dispersed in ethanol (1 mL). After PVP solution (4 mL) described above was added, the mixture was stirred to get the well dispersed Co(OH)<sub>2</sub> suspensions in PVP solution. The solutions were loaded onto a doctor blade (Kipae E&T Co., KP-3000 V). The target coating thickness of materials was set to 30 μm. The materials were spread on the PVC mat using a doctor blade. After drying the loaded PVP-Co(OH)<sub>2</sub> on the PVC mat for several days under air, the PVP-Co films with a thickness of 22 μm were detached from the PVC mat and cut to pieces with specific areas.

For the preparation of PU and PU-Co films, PU mother solution was prepared as follows. PU (1 g, Aldrich Co., Cat.# 81367, Selectophore™) was dissolved in THF (9 g) through stirring for 4 h at 50 °C in a 30 mL vial. To check the weight of PU per volume of PU solution in an empirical way, four sets of the PU solutions (4 mL) were taken and transferred to 20 mL vials and the THF was completely evaporated at 80 °C under vacuum. The average weight of the remained PU in four vials was analyzed to be 0.472 g. For the preparation of a PU film, PU solution (4 mL) described above was loaded on a doctor blade (Kipae E&T Co., KP-3000 V). The target coating thickness of materials was set to 30 μm. Using a doctor blade, the PU solution was loaded on the polyethylene (PE) film. After drying the PU solution on the PE film for several days under air, the PU film with a thickness of 18 μm was detached from the PE film and cut to pieces with specific areas. For the preparation of PU-Co films, Co(OH)<sub>2</sub> nanoplates (0.12, 0.24, 0.48, 1.18, 2.73, 4.77, 14.6, 24.8, 35.5, and 52.4 mg for 0.025, 0.05, 0.1, 0.25, 0.5, 1, 3, 5, 7, and 10 wt% Co(OH)<sub>2</sub> in PU-Co films) were well dispersed in THF (1 mL). After PU solution (4 mL) was added, the mixture was stirred to get the well dispersed Co(OH)<sub>2</sub> suspensions in PU solution. The solutions were loaded on a doctor blade (Kipae E&T Co., KP-3000 V). The target coating thickness of materials was set to 30 μm. The materials were spread on the PE film using a doctor blade. After drying the loaded PU-Co(OH)<sub>2</sub> on the PE film for several days under air, the PU-Co films with a thickness of 20 μm were detached from the PE films and cut to pieces with specific areas.

### ***Studies of triboelectric performance***

As tribopositive materials, PVP, PVP-Co, PU, PU-Co films with thicknesses of 18~22 μm and an area of 2 cm × 2 cm were attached to the Au electrode (2 cm × 2 cm, 35 μm) of the printed circuit board (PCB, 3 cm × 3 cm, a PR-4 glassy epoxy film) using a carbon tape (2 cm × 2 cm). The tribopositive part was fixed using a tape on the bottom and the Au electrode was connected to the negative electrode of the measurement device. As a tribonegative material, a perfluoroalkoxy alkanes (PFA, Alphafion) film with a thickness of 25 μm and an area of 2 cm × 2 cm was attached on the Cu electrode (3M™ Conductive Copper Foil Tape 3313, 2 cm × 2 cm) on the polycarbonate support (2 cm × 2 cm) using a carbon tape (2 cm × 2 cm). The Cu electrode of the electronegative part was connected to probes (P6139B voltage probe for the measurement of PVP and PUV-Co films, TMDP0200 Differential Probe. Tektronix for the measurement of PU and PU-Co films). The probe was connected to the oscilloscope (DPO 3052, Tektronix) to measure potentials. The output currents were obtained through conversion using a low noise current amplifier (DLPCA-200, FEMTO). For the studies of triboelectric performance, two tribopositive materials and the tribonegative material were contacted using a

pushing tester (JIPT-120, JUNIL TECH Co.). The pushing forces with 0.5, 1, 1.5, 2, and 2.5 kgf and the pushing frequencies with 0.23, 0.30, 0.42, 0.73, and 2.76 Hz were scanned. The effect of relative humidity was studied at RH 30, 50, and 80%. The stability tests of triboelectric performance were conducted for 30,000 cycles.

The resistance-dependent currents and power densities were obtained at the resistances of 10 k $\Omega$ , 30 k $\Omega$ , 60 k $\Omega$ , 100 k $\Omega$ , 300 k $\Omega$ , 600 k $\Omega$ , 1 M $\Omega$ , 3 M $\Omega$ , 6 M $\Omega$ , 10 M $\Omega$ , 30 M $\Omega$ , 60 M $\Omega$ , and 100 M $\Omega$  using a low noise current amplifier (DLPCA-200, FEMTO). For the measurement of the maximum power density, a working area and film thicknesses of the PVP-Co0.1 and PU-Co0.1 films were 1 cm  $\times$  1 cm and 20 ~ 22  $\mu$ m, respectively. The pushing force and frequency were 1 kgf and 3 Hz, respectively. The measurement was conducted at RH 30%. The perfluoroalkoxyalkane (PFA) film with a working area of 1 cm  $\times$  1 cm and a thickness of 25  $\mu$ m was used as a counting tribonegative material.

### ***Demonstration studies of triboelectric devices as power suppliers***

For the charging test of a capacitor, an Al electrolytic capacitor (2.2  $\mu$ F, Panasonic co., ECA1HM2R2) and a full wave bridge rectifier (Rectron Semiconductor co., W04M) were connected to the TENG consisting of PVP-Co0.1 and PU-Co0.1 films with an working area of 1 cm  $\times$  1 cm and film thicknesses of 20~22  $\mu$ m and a PFA film with an working area of 1 cm  $\times$  1 cm and a thickness of 25  $\mu$ m. The charged voltages of the capacitor were measured for 200 s using an oscilloscope (Tektronix co., DPO3020) with a voltage probe (Tektronix co., P5100A) at 40 M $\Omega$  input impedance. The pushing force of 1 kgf and a pushing frequency of 3 Hz were applied with a pushing tester (Z-Tech, ZPS-100) at RH 30%. For the irradiation test of a LED, 100 green LEDs (Photron co., PV525-5A5D-NNISLA-Z) and a full wave bridge rectifier (Rectron Semiconductor co., W04M) were connected to the TENG consisting of PVP-Co0.1 and PU-Co0.1 films with an working area of 1 cm  $\times$  1 cm and film thicknesses of 20~22  $\mu$ m and a PFA film with an working area of 1 cm  $\times$  1 cm and a thickness of 25  $\mu$ m. The pushing force of 1 kgf and a pushing frequency of 3 Hz were applied with a pushing tester (Z-Tech, ZPS-100) at RH 30%. The photographs were obtained in a dark room.

For the operating test of a calculator, after its built-in battery was removed, the commercial calculator (Canon co., AS-120II) was connected to a 100  $\mu$ F Al electrolytic capacitor (Samyoung Electronics co., SHL series), a full wave bridge rectifier (Rectron Semiconductor co., W04M), and the TENG of PVP-Co0.1 and PU-Co0.1 films with an working area of 3 cm  $\times$  3 cm and film thicknesses of 20~22  $\mu$ m and a PFA film with an working area of 3 cm  $\times$  3 cm and a thickness of 25  $\mu$ m. The pushing force of 2 kgf and a pushing frequency of 3 Hz were applied with a pushing tester (Z-Tech, ZPS-100) at RH 30%. The charged and discharged voltages of the capacitor were measured for 200 s using an electrometer (Keithley 6514) with an input impedance at 200 G $\Omega$ .

**Fig. S1** XPS Co 2p orbital spectra of Co(OH)<sub>2</sub> on carbon tapes before and after pushing tests: a pushing force of 2 kgf, a pushing frequency of 0.75 Hz for 12 h, RH 30%, perfluoroalkoxyalkane (PFA) as a counting tribonegative material with a thickness of 25 μm.

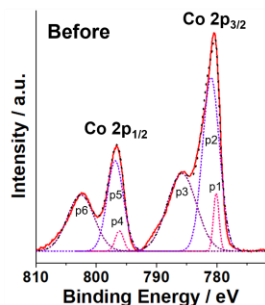

| Before         | Peak          | p1      | p2      | p3      | p4      | p5      | p6      |
|----------------|---------------|---------|---------|---------|---------|---------|---------|
|                | position (eV) | 780.149 | 781.020 | 785.858 | 796.206 | 796.897 | 802.588 |
|                | FWHM          | 1.090   | 3.312   | 5.724   | 1.615   | 3.192   | 5.224   |
|                | Area (%)      | 3.702   | 33.906  | 26.207  | 1.925   | 16.998  | 17.262  |
| r <sup>2</sup> | 0.99          |         |         |         |         |         |         |

$$\text{Co}^{2+} : \text{Co}^{3+} = 1 : 0.11$$

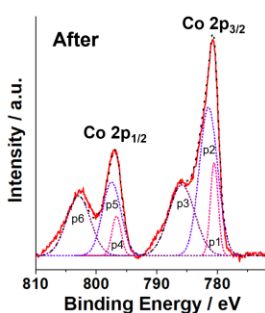

| After          | Peak          | p1      | p2      | p3      | p4      | p5      | p6      |
|----------------|---------------|---------|---------|---------|---------|---------|---------|
|                | position (eV) | 780.539 | 781.503 | 785.899 | 796.676 | 797.492 | 802.961 |
|                | FWHM          | 1.504   | 3.546   | 5.050   | 1.781   | 3.577   | 4.661   |
|                | Area (%)      | 8.54037 | 32.184  | 21.875  | 4.273   | 16.092  | 17.036  |
| r <sup>2</sup> | 0.99          |         |         |         |         |         |         |

$$\text{Co}^{2+} : \text{Co}^{3+} = 1 : 0.26$$

**Fig. S2** Tensile tests of (a) PVP and PVP-Co0.1 films with thicknesses of 21 and 22  $\mu\text{m}$ , respectively, and (b) PU and PU-Co0.1 films with thicknesses of 18 and 20  $\mu\text{m}$ , respectively, and (c) corresponding parameters.

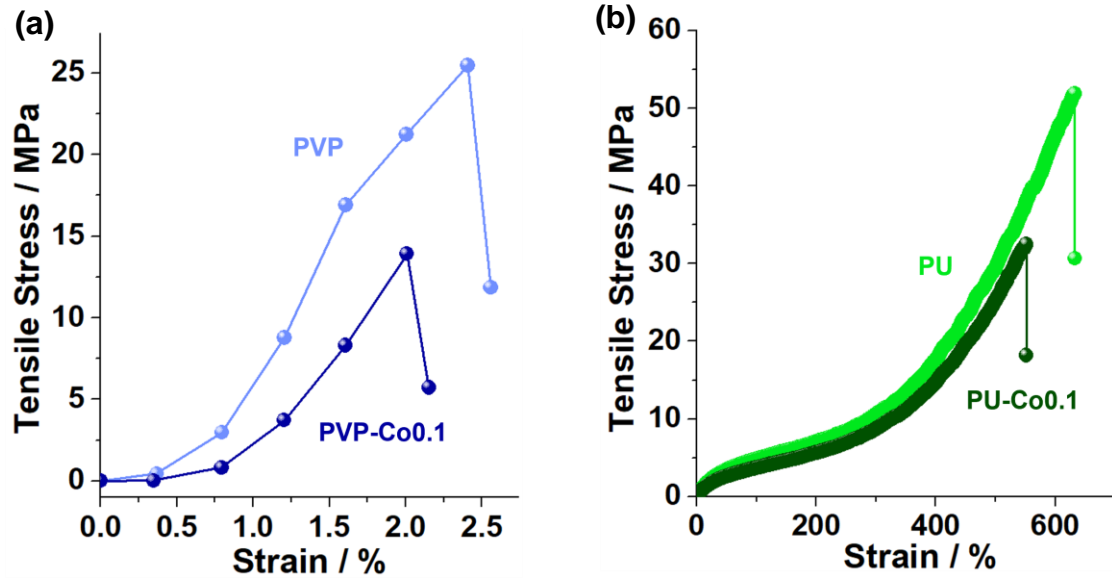

(c)

| Materials | Max. Strain (%) | MAX. Strength (Mpa) | Young's Modulus (Gpa) |
|-----------|-----------------|---------------------|-----------------------|
| PVP       | 2.56            | 25.5                | 1.43                  |
| PVP-Co0.1 | 2.00            | 13.9                | 1.08                  |
| PU        | 630             | 51.9                | 0.015                 |
| PU-Co0.1  | 550             | 32.5                | 0.009                 |

**Fig. S3** Side view SEM images of (a) PVP, (b) PVP-Co0.1, (c) PU, and (d) PU-Co0.1 films.

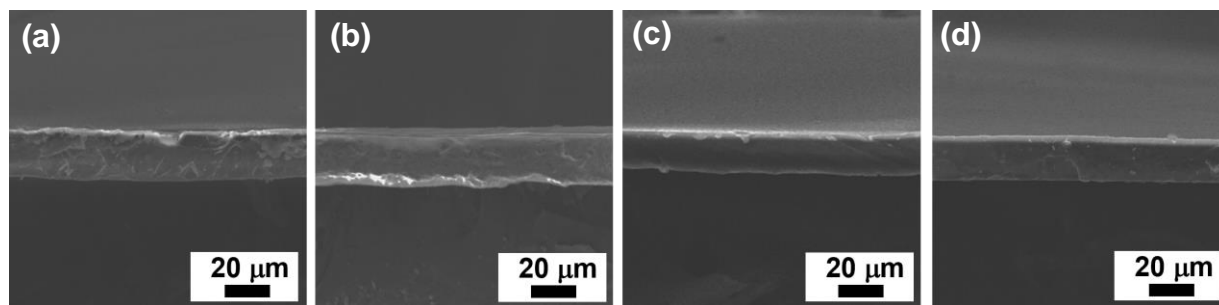

**Fig. S4** Output currents of triboelectric devices fabricated with (a, c, e) PVP-Co0.1 films and (b, d, f) PU-Co0.1 films depending on pushing forces, frequencies, and relative humidity (RH). Standard conditions: a working area of 2 cm × 2 cm, film thickness of 22 μm (PVP-Co0.1) and 20 μm (PU-Co0.1), pushing force of 2 kgf, a pushing frequency of 0.75 Hz, RH 30%, PFA as a counting tribonegative material with a thickness of 25 μm.

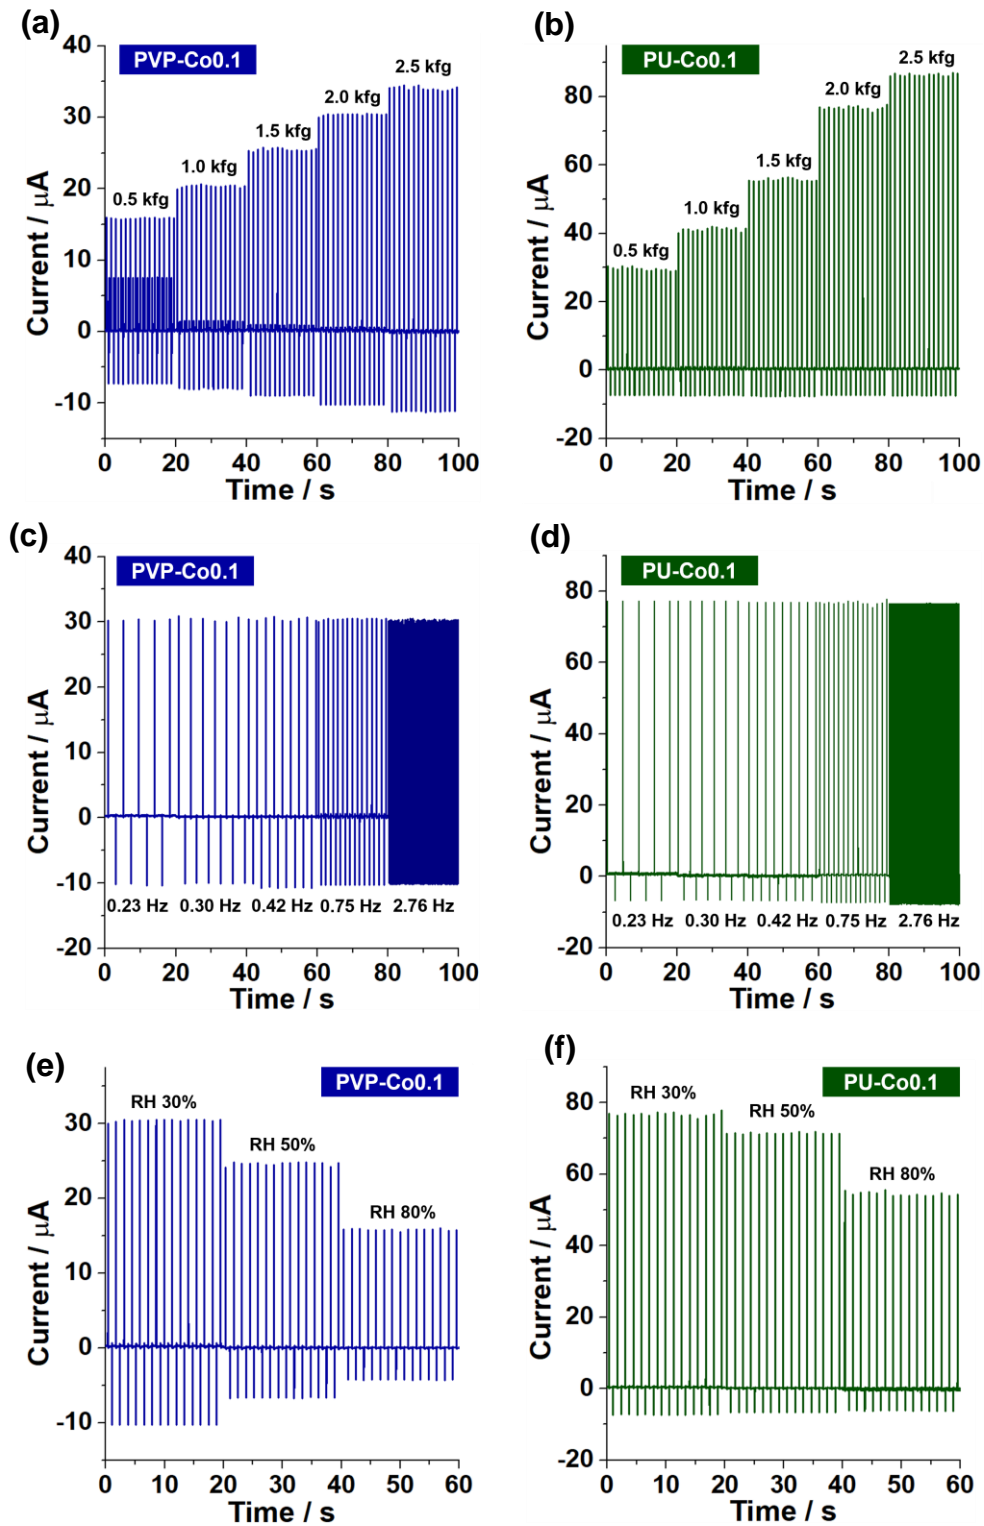

**Fig. S5** Output voltages of triboelectric devices fabricated with PVP-Co0.1 and PU-Co0.1 films depending on temperature. Standard conditions: a working area of  $2\text{ cm} \times 2\text{ cm}$ , film thickness of  $22\text{ }\mu\text{m}$  (PVP-Co0.1) and  $20\text{ }\mu\text{m}$  (PU-Co0.1), pushing force of  $2\text{ kgf}$ , a pushing frequency of  $0.75\text{ Hz}$ , RH 30%, PFA as a counting tribonegative material with a thickness of  $25\text{ }\mu\text{m}$ .

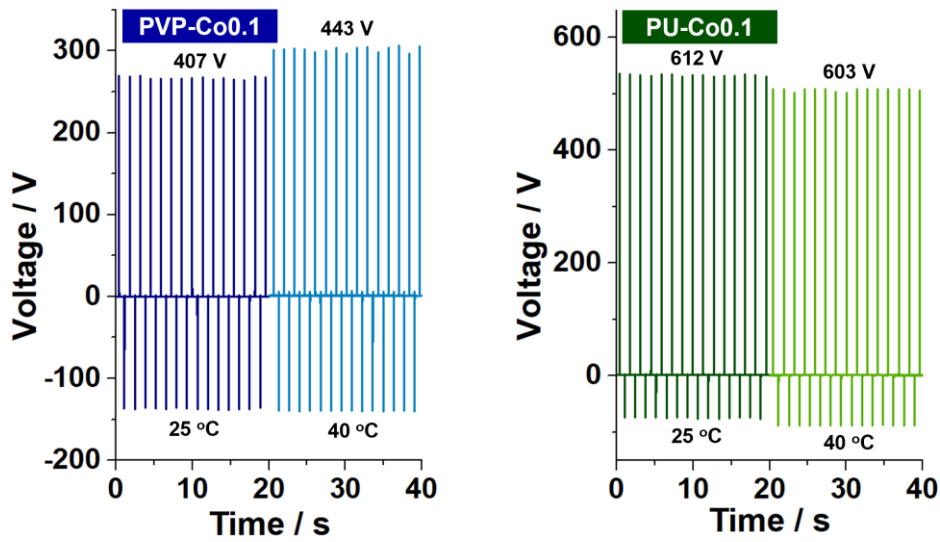



**Table S1** Triboelectric performance of polymer-based systems in the literature.<sup>S1</sup>

| Entry | Tribo-positive materials            | Tribo-negative materials | V <sub>pp</sub><br>(V) | P <sub>max</sub><br>(mW/cm <sup>2</sup> ) | Year | Ref.      |
|-------|-------------------------------------|--------------------------|------------------------|-------------------------------------------|------|-----------|
| 1     | PPy                                 | PTFE                     | 28                     | 0.55                                      | 2016 | S2        |
| 2     | Silk fibroin                        | PET                      | 268                    | 0.194                                     | 2016 | S3        |
| 3     | Porous chitosan                     | Porous PI                | 56                     | 0.45                                      | 2018 | S4        |
| 4     | PLA nanofiber                       | Gelatin                  | 500                    | 0.5                                       | 2018 | S5        |
| 5     | Silk fibroin                        | Mxene-PVA                | ~225                   | 0.109                                     | 2019 | S6        |
| 6     | TPU                                 | PDMS                     | 400                    | 0.27                                      | 2020 | S7        |
| 7     | FAS/PVDF-HFP/SiO <sub>2</sub> /EVOH | PTFE                     | 144.9                  | 0.214                                     | 2020 | S8        |
| 8     | SPS/P2VP/APEO                       | FOTS-SAM/PDMS            | ~70                    | 0.077                                     | 2020 | S9        |
| 9     | Cellulose aerogel                   | PTFE                     | 65                     | 0.0127                                    | 2020 | S10       |
| 10    | Graphene-PDMS                       | PTFE-PDMS                | 128                    | 0.041                                     | 2020 | S11       |
| 11    | CMP                                 | PFA                      | 411                    | 0.80                                      | 2021 | S12       |
| 12    | Waste PP                            | Mylar                    | 200                    | 0.007116                                  | 2021 | S13       |
| 13    | PMMA                                | PVDF                     | 120                    | 0.00018                                   | 2021 | S14       |
| 14    | PI                                  | PVDF-TrFE/PEDOT:PSS      | 15.6                   | 0.00128                                   | 2022 | S15       |
| 15    | COF@PVDF                            | PVDF                     | 420                    | 0.2858                                    | 2022 | S16       |
| 16    | PVA/Tp-TFAB                         | PVC                      | 177.8                  | 0.000824                                  | 2023 | S17       |
| 17    | PANI/EC-CPCF                        | FEP                      | 130                    | 0.065                                     | 2023 | S18       |
| 18    | PU-Co0.1                            | PFA                      | 612                    | 1.22                                      |      | This work |

PPy: poly(pyrrole), PTFE: poly(tetrafluoroethylene), PET: poly(ethylene terephthalate), PI: polyimide, PLA: poly(lactic acid), PVA: poly(vinyl alcohol), TPU: thermoplastic polyurethane, PDMS: polydimethylsiloxane, FAS: perfluorodecyltriethoxysilane, PVDF: poly(vinylidene fluoride), PVDF-HFP: poly(vinylidene fluoride-co-hexafluoropropylene), EVOH: poly(ethylene-co-poly(vinyl alcohol)), SPS: sulfonic acid-terminated poly(styrene), P2VP: poly(2-vinylpyridine), APEO: amine-terminated poly(ethylene oxide), FOTS: perfluorooctyltrichlorosilane, SAM: self-assembled monolayer, CMP: conjugated microporous polymer, PFA: perfluoroalkoxyalkane, PP: polypropylene, PMMA: poly(methyl methacrylate), PI: polyimide, PVDF-TrFE: poly(vinylidene fluoride-co-trifluoroethylene), PEDOT: poly(3,4-ethylenedioxythiophene), PSS: poly(styrenesulfonate), COF: covalent organic framework, TFAB: 1,3,5-tris(2,3,5,6-tetrafluoroaniline)benzene, Tp: triformylphloroglucinol, PANI: polyaniline, EC: ethylcellulose, CPCF: conductive polymer composite film, FEP: fluorinated ethylene propylene, PU: polyurethane.

S1 A. Chen, C. Zhang, G. Zhu and Z. L. Wang, *Adv. Sci.*, 2020, **7**, 2000186.

S2 J. Wang, Z. Wen, Y. Zi, P. Zhou, J. Lin, H. Guo, Y. Xu and Z. L. Wang, *Adv. Funct. Mater.*, 2016, **26**, 1070-1076.

S3 X. -S. Zhang, J. Brugger and B. Kim, *Nano Energy*, 2016, **20**, 37-47.

S4 Q. Zheng, L. Fang, H. Guo, K. Yang, Z. Cai, M. A. B. Meador and S. Gong, *Adv. Funct. Mater.*, 2018, **28**, 1706365.

S5 R. Pan, W. Xuan, J. Chen, S. Dong, H. Jin, X. Wang, H. Li and J. Luo, *Nano Energy*, 2018, **45**, 193-202.

S6 C. Jiang, C. Wu, X. Li, Y. Yao, L. Lan, F. Zhao, Z. Ye, Y. Ying and J. Ping, *Nano Energy*, 2019, **59**, 268-276.

S7 F. Chen, Y. Wu, Z. Ding, X. Xia, S. Li, H. Zheng, C. Diao, G. Yue and Y. Zi, *Nano Energy*, 2019, **56**, 241-251.

S8 S. Yan, K. Dong, J. Lu, W. Song and R. Xiao, *Nanoscale*, 2020, **12**, 4527-4536.

S9 C. Park, M. Koo, G. Song, S. M. Cho, H. S. Kang, T. H. Park, E. H. Kim and C. Park, *ACS Nano*, 2020, **14**, 755-766.

S10 L. Zhang, Y. Liao, Y. -C. Wang, S. Zhang, W. Yang, X. Pan and Z. L. Wang, *Adv. Funct. Mater.*, 2020, **30**, 2001763.

S11 X. Zhao, D. Zhang, S. Xu, W. Qian, W. Han, Z. L. Wang and Y. Yang, *Nano Energy*, 2020, **75**, 104920.

S12 S. I. Park, D. -M. Lee, C. W. Kang, S. M. Lee, H. J. Kim, Y. -J. Ko, S. -W. Kim and S. U. Son, *J. Mater. Chem. A*, 2021, **9**, 12560-12565.

S13 H. Varghese and A. Chandran, *ACS Appl. Mater. Interfaces*, 2021, **13**, 51132-51140.

S14 H. Varghese and A. Chandran, *Sustainable Energy Fuels*, 2021, **5**, 5287-5294.

S15 M. H. Chung, H.-J. Kim, S. Yoo, H. Jeong and K. -H. Yoo, *RSC Adv.*, 2022, **12**, 2820-2829.

S16 C. Lin, L. Sun, X. Meng, X. Yuan, C. -X. Cui, H. Qiao, P. Chen, S. Cui, L. Zhai and L. Mi, *Angew. Chem. Int. Ed.*, 2022, **61**, e202211601.

S17 L. Shi, V. S. Kale, Z. Tian, X. Xu, Y. Lei, S. Kandambeth, Y. Wang, P. T. Parvatkar, O. Shekhah, M. Eddaoudi and H. N. Alshareef, *Adv. Funct. Mater.*, 2023, **33**, 2212891.

S18 P. Manchi, S. A. Graham, M. V. Paranjape and J. S. Yu, *ACS Appl. Polym. Mater.*, 2023, **5**, 8650-8659.

**Table S2** Triboelectric performance of inorganic nanomaterials/polymer composite-based systems in the literature.

| Entry | Composites                      | Nanomaterials                                 | Triboelectric<br>Polymer Materials | $V_{p-p}$<br>(V) | $P_{max}$<br>(mW/cm <sup>2</sup> ) | Year | Ref       |
|-------|---------------------------------|-----------------------------------------------|------------------------------------|------------------|------------------------------------|------|-----------|
| 1     | ZnSnO <sub>3</sub> /PDMS        | ZnSnO <sub>3</sub>                            | PDMS                               | 400              | 0.75                               | 2015 | S1        |
| 2     | ZnO NR/PDMS-PVDF                | ZnO NR                                        | PDMS-PVDF                          | 40               | 0.007                              | 2016 | S2        |
| 3     | BaTiO <sub>3</sub> @PDMS        | BaTiO <sub>3</sub>                            | PDMS                               | 60               | 0.009741                           | 2016 | S3        |
| 4     | ZnO-PVDF/PTFE                   | ZnO                                           | PVDF/PTFE                          | 97               | 0.0245                             | 2018 | S4        |
| 5     | PVDF-BTO                        | BaTiO <sub>3</sub>                            | PVDF/PTFE                          | 150              | 0.32                               | 2019 | S5        |
| 6     | Y-ZnO MFs/PDMS                  | Y-ZnO MFs                                     | PDMS                               | 247              | 0.6                                | 2021 | S6        |
| 7     | Chitosan/BaTiO <sub>3</sub> NRs | BaTiO <sub>3</sub> NRs                        | Chitosan                           | 111.4            | 0.756                              | 2021 | S7        |
| 8     | Porous PDMS/BTO CF              | BaTiO <sub>3</sub>                            | Porous PDMS                        | 280              | 0.04                               | 2021 | S8        |
| 9     | BaTiO <sub>3</sub> /PVDF        | BaTiO <sub>3</sub>                            | PVDF                               | 444              | 0.04                               | 2022 | S9        |
| 10    | PVDF-MoS <sub>2</sub> /CNT      | MoS <sub>2</sub> /CNT                         | PVDF                               | 300              | 0.0134                             | 2022 | S10       |
| 11    | ZnO@MOP                         | ZnO                                           | MOP                                | 534              | 1.19                               | 2022 | S11       |
| 12    | MXene-PVDF                      | Ti <sub>3</sub> C <sub>2</sub> T <sub>x</sub> | PVDF                               | 24               | 0.00408                            | 2023 | S12       |
| 13    | TM6S/PET                        | Ti <sub>3</sub> C <sub>2</sub> T <sub>x</sub> | PET                                | 390              | 0.666                              | 2023 | S13       |
| 14    | Mxene/Leather                   | MXene                                         | Leather                            | 199.56           | 0.469                              | 2023 | S14       |
| 15    | PU-Co0.1                        | Co(OH) <sub>2</sub>                           | PU                                 | 612              | 1.22                               |      | This work |

PDMS: polydimethylsiloxane, NR: nanorod, PVDF: poly(vinylidene fluoride), PTFE: poly(tetrafluoroethylene), BTO: BaTiO<sub>3</sub>, CNT: carbon nanotube, MOP: microporous organic polymer, TM6S: Ti<sub>3</sub>C<sub>2</sub>T<sub>x</sub>, PET: poly(ethylene terephthalate), PU: polyurethane

- S1 G. Wang, Y. Xi, H. Xuan, R. Liu, X. Chen and L. Cheng, *Nano Energy*, 2015, **18**, 28-36.  
S2 X. Yang and W. A. Daoud, *Adv. Funct. Mater.*, 2016, **26**, 8194-8201.  
S3 B. Shi, Q. Zheng, W. Jiang, L. Yan, X. Wang, H. Liu, Y. Yao, Z. Li and Z. L. Wang, *Adv. Mater.*, 2016, **28**, 846-852.  
S4 H. H. Singh and N. Khare, *Nano Energy*, 2018, **51**, 216-222.  
S5 S. Sriphan, T. Charoonsuk, T. Maluangnont and N. Vittayakorn, *ACS Appl. Energy Mater.*, 2019, **2**, 3840-3850.  
S6 H. Patnam, S. A. Graham and J. S. Yu, *ACS Sustainable Chem. Eng.*, 2021, **9**, 4600-4610.  
S7 S. Pongampai, T. Charoonsuk, N. Pinpru, P. Pulohol, W. Vittayakorn, P. Pakawanit and N. Vittayakorn, *Composites Part B*, 2021, **208**, 108602.  
S8 M. Sahu, V. Vivekananthan, S. Hajra, D. K. Khatua and S. -J. Kim, *Appl. Mater. Today*, 2021, **22**, 100900.  
S9 J. -H. Zhang, Z. Zhou, J. Li, B. Shen, T. Zhu, X. Gao, R. Tao, X. Guo, X. Hu, Y. Shi and L. Pan, *ACS Mater. Lett.*, 2022, **4**, 847-852.  
S10 C. Sun, G. Zu, Y. Wei, X. Song and X. Yang, *Langmuir*, 2022, **38**, 1479-1487.  
S11 C. W. Kang, D. -M. Lee, J. Park, S. Bang, S. -W. Kim and S. U. Son, *Angew. Chem. Int. Ed.*, 2022, **61**, e202209659.  
S12 M. M. Hasan, M. S. B. Sadeque, I. Albasar, H. Pecenek, F. K. Dokan, M. S. Onses and M. Ordu, *Small*, 2023, **19**, 2206107.  
S13 S. Answer, M. U. Khan, B. Mohammad, M. Rezeq, W. Cantwell, D. Gan and L. Zheng, *Chem. Eng. J.*, 2023, **470**, 144281  
S14 S. Zhang, Y. Xiao, H. Chen, Y. Zhang, H. Liu, C. Qu, H. Shao and Y. Xu, *ACS Appl. Mater. Interfaces*, 2023, **15**, 13802–13812
